# Supplementary material
Source: HighWire-hosted journal article supplement (http://bmjopenquality.bmj.com/highwire/filestream/142453/field_highwire_adjunct_files/0/bmjoq-2021-001421supp001_data_supplement.pdf)

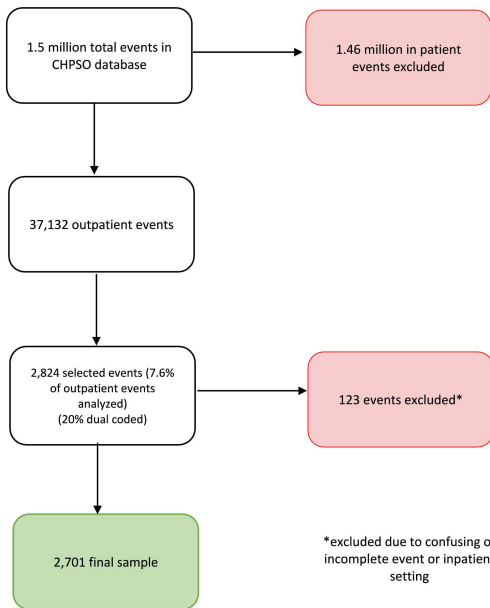

Supplement: bmjoq-2021-001421supp001_data_supplement.pdf [file bmjoq-2021-001421supp001_data_supplement.pdf]
